# Supplementary material for: Intermolecular magnetic interactions in stacked DNA base pairs
Source: Royal Society of Chemistry journal article supplement (doi:10.1039/c7cp04484d), 2017-01-01
Supplement: c7cp04484d1.pdf [file c7cp04484d1.pdf]

## SUPPORTING INFORMATION

### Intermolecular magnetic interactions in stacked DNA base pairs

Fernando A. Martínez and Gustavo A. Aucar

**Table S1:** Thymine (optimized geometry, at B3LYP/cc-pVTZ level of theory)

|   |             |             |             |
|---|-------------|-------------|-------------|
| N | -1.11617900 | -1.23839600 | -0.00008800 |
| C | 0.23911200  | -1.47534800 | -0.00003000 |
| H | 0.52042800  | -2.51925000 | 0.00004800  |
| C | 1.15265500  | -0.48738500 | -0.00006500 |
| C | 2.63155000  | -0.71708100 | 0.00006400  |
| H | 2.86470500  | -1.78123000 | -0.00015100 |
| H | 3.09576000  | -0.25778300 | -0.87384500 |
| H | 3.09556200  | -0.25818000 | 0.87428800  |
| C | 0.67101300  | 0.89538200  | -0.00006300 |
| O | 1.38058100  | 1.88203900  | 0.00029500  |
| N | -0.72569300 | 1.02889700  | -0.00061000 |
| H | -1.08334000 | 1.97343600  | -0.00024400 |
| C | -1.67647600 | 0.02741400  | -0.00001000 |
| O | -2.87215600 | 0.22430000  | 0.00035000  |
| H | -1.77453300 | -1.99910400 | 0.00024600  |

**Table S2:** Adenine (optimized geometry, at B3LYP/cc-pVTZ level of theory)

|   |             |             |             |
|---|-------------|-------------|-------------|
| N | 2.06916100  | 0.58519400  | -0.00018500 |
| C | 2.28324900  | -0.77432700 | 0.00014400  |
| H | 3.27877700  | -1.18774100 | 0.00034800  |
| N | 1.17899600  | -1.47006200 | -0.00013400 |
| C | 0.17779600  | -0.51687800 | 0.00001900  |
| C | -1.22551100 | -0.60765300 | 0.00008900  |
| N | -1.87248500 | -1.79153700 | -0.00000800 |
| H | -2.87574400 | -1.80033000 | -0.00005700 |
| H | -1.35525000 | -2.65069000 | -0.00020300 |
| N | -1.94066500 | 0.52465800  | 0.00011900  |
| C | -1.29081500 | 1.69467200  | -0.00000300 |
| H | -1.92139600 | 2.57610200  | 0.00010500  |
| N | 0.02156100  | 1.91543400  | -0.00011900 |
| C | 0.70762800  | 0.77160200  | -0.00007200 |
| H | 2.76355900  | 1.31236000  | 0.00104000  |

**Table S3:** Guanine (optimized geometry, at B3LYP/cc-pVTZ level of theory)

|   |            |             |             |
|---|------------|-------------|-------------|
| N | 1.72704100 | -1.50107000 | -0.00317300 |
| C | 2.70885800 | -0.52996300 | 0.00111600  |
| H | 3.75588000 | -0.78454100 | -0.00013800 |
| N | 2.22074800 | 0.67667300  | 0.00674200  |

|   |             |             |             |
|---|-------------|-------------|-------------|
| C | 0.85278700  | 0.50323600  | 0.00664700  |
| C | -0.21006500 | 1.46860800  | 0.00260800  |
| O | -0.19176200 | 2.68003700  | -0.00277400 |
| N | -1.47362800 | 0.78739000  | -0.00288800 |
| H | -2.26511600 | 1.41082700  | -0.06643000 |
| C | -1.66983100 | -0.56412000 | -0.00307800 |
| N | -2.96841000 | -1.00506700 | -0.06606900 |
| H | -3.67991600 | -0.43520800 | 0.36045700  |
| H | -3.06523400 | -1.99252900 | 0.10584200  |
| N | -0.69395200 | -1.43195800 | 0.00686800  |
| C | 0.52756100  | -0.84801800 | -0.00035500 |
| H | 1.85003400  | -2.49906500 | -0.00952400 |

**Table S4:** Cytosine (optimized geometry, at B3LYP/cc-pVTZ level of theory)

|   |             |             |            |
|---|-------------|-------------|------------|
| N | -1.20473400 | -0.98852500 | 0.00000000 |
| C | -0.06853500 | -1.71706600 | 0.00000000 |
| H | -0.17659000 | -2.79275400 | 0.00000000 |
| C | 1.13400100  | -1.09778700 | 0.00000000 |
| H | 2.05575200  | -1.65694500 | 0.00000000 |
| C | 1.10589000  | 0.33850100  | 0.00000000 |
| N | 2.27671700  | 1.01890900  | 0.00000000 |
| H | 2.24221500  | 2.02275900  | 0.00000000 |
| H | 3.16243300  | 0.55160600  | 0.00000000 |
| N | 0.00000000  | 1.04929900  | 0.00000000 |
| C | -1.22134700 | 0.43565300  | 0.00000000 |
| O | -2.29710100 | 0.99873100  | 0.00000000 |
| H | -2.11094200 | -1.42810100 | 0.00000000 |

**Table S5:** Adenine-Thymine (optimized geometry, at B3LYP/cc-pVTZ level of theory)

|   |             |             |             |
|---|-------------|-------------|-------------|
| N | 4.99119500  | 0.53972300  | 0.00102500  |
| C | 5.23349900  | -0.81536000 | 0.00091800  |
| H | 6.23692300  | -1.20896300 | 0.00135100  |
| N | 4.14250200  | -1.53146200 | 0.00030600  |
| C | 3.12321100  | -0.59901000 | -0.00008200 |
| C | 1.72007000  | -0.72984800 | -0.00078100 |
| N | 1.09822200  | -1.91561600 | -0.00143500 |
| H | 0.08239100  | -1.96965500 | -0.00105800 |
| H | 1.65285100  | -2.75206100 | -0.00064000 |
| N | 0.99292200  | 0.40534200  | -0.00090700 |
| C | 1.61655700  | 1.59428100  | -0.00041000 |
| H | 0.95877200  | 2.45560800  | -0.00055400 |
| N | 2.92156500  | 1.83328700  | 0.00022700  |
| C | 3.62704100  | 0.69812400  | 0.00037200  |
| H | 5.66979900  | 1.28165900  | 0.00147700  |
| N | -1.88886600 | 0.41355800  | -0.00044700 |
| N | -3.89294100 | 1.56268400  | 0.00035700  |
| C | -2.50732300 | 1.64315500  | -0.00019900 |
| C | -2.50611700 | -0.82774200 | -0.00014200 |
| C | -3.96721400 | -0.81925600 | 0.00041300  |
| C | -4.58425400 | 0.37779300  | 0.00064800  |
| O | -1.91863800 | 2.70522800  | -0.00044500 |
| O | -1.83760600 | -1.85851800 | -0.00034300 |
| H | -0.84655900 | 0.42449200  | -0.00090900 |
| H | -4.37515000 | 2.44565200  | 0.00063600  |
| H | -5.66145600 | 0.47166800  | 0.00105600  |
| C | -4.69034800 | -2.12966400 | 0.00071200  |
| H | -4.42057000 | -2.72391500 | -0.87357500 |
| H | -5.76978200 | -1.98187600 | 0.00092700  |

H -4.42020100 -2.72373400 0.87501000

**Table S6:** Guanine-Cytosine (optimized geometry, at B3LYP/cc-pVTZ level of theory).

|   |             |             |             |
|---|-------------|-------------|-------------|
| N | 4.66215100  | 0.47789800  | -0.01002800 |
| C | 4.96101900  | -0.87288300 | -0.01349000 |
| H | 5.97960600  | -1.22494200 | -0.01942800 |
| N | 3.89938400  | -1.62340600 | -0.00969200 |
| C | 2.84100000  | -0.73438500 | -0.00214000 |
| C | 1.43127400  | -0.95031400 | 0.00441500  |
| O | 0.80990900  | -2.01667000 | 0.00482100  |
| N | 0.72991000  | 0.26617400  | 0.01054300  |
| H | -0.29588300 | 0.18218700  | 0.01273600  |
| C | 1.28840600  | 1.51711900  | 0.01053500  |
| N | 0.43668000  | 2.55979600  | 0.02147900  |
| H | -0.57499100 | 2.44756600  | 0.00795700  |
| H | 0.84167400  | 3.47692400  | 0.00628400  |
| N | 2.59152000  | 1.72577900  | 0.00351000  |
| C | 3.29862200  | 0.58253500  | -0.00228000 |
| H | 5.30623000  | 1.24971700  | -0.01204300 |
| N | -4.33404600 | 0.90780700  | -0.01514500 |
| C | -4.93292300 | -0.30882500 | -0.01380700 |
| H | -6.01340900 | -0.31697300 | -0.02164500 |
| C | -4.18912000 | -1.43492000 | -0.00327300 |
| H | -4.64911000 | -2.40998100 | -0.00228800 |
| C | -2.75858100 | -1.27469900 | 0.00625400  |
| N | -1.95832200 | -2.33941000 | 0.01605300  |
| H | -0.93029600 | -2.22867100 | 0.01913700  |
| H | -2.35327200 | -3.26184500 | 0.01538000  |
| N | -2.19157000 | -0.06799600 | 0.00564000  |
| C | -2.93674200 | 1.06166900  | -0.00548200 |
| O | -2.47330700 | 2.20017900  | -0.00781500 |
| H | -4.87104500 | 1.75966800  | -0.02305100 |

**Table S7:** AATTC geometry (taken from PDB)

|   |             |             |             |
|---|-------------|-------------|-------------|
| N | 1.72058265  | -4.08701478 | 6.02010397  |
| C | 2.98758265  | -3.90001478 | 5.53510397  |
| N | 3.19258265  | -2.65701478 | 5.06610397  |
| C | 2.00258265  | -2.05001478 | 5.25110397  |
| C | 1.55958265  | -0.72401478 | 4.97210397  |
| N | 2.37458265  | 0.21898522  | 4.42110397  |
| N | 0.29558265  | -0.42501478 | 5.27110397  |
| C | -0.49241735 | -1.35101478 | 5.82210397  |
| N | -0.20741735 | -2.61101478 | 6.13710397  |
| C | 1.07958265  | -2.89301478 | 5.81410397  |
| N | -1.75241735 | -4.47701478 | 3.23110397  |
| C | -0.55541735 | -5.10401478 | 3.02110397  |
| N | 0.37858265  | -4.28901478 | 2.50910397  |
| C | -0.25441735 | -3.10201478 | 2.39910397  |
| C | 0.20258265  | -1.81601478 | 1.96810397  |
| N | 1.49058265  | -1.58501478 | 1.58010397  |
| N | -0.67141735 | -0.81201478 | 2.00510397  |
| C | -1.91741735 | -1.04101478 | 2.42510397  |
| N | -2.46041735 | -2.17901478 | 2.85110397  |
| C | -1.55441735 | -3.18001478 | 2.81010397  |
| N | -3.64941735 | -3.10001478 | -0.28189603 |
| C | -2.84841735 | -2.08001478 | -0.67089603 |
| O | -3.28741735 | -0.92601478 | -0.70389603 |
| N | -1.55141735 | -2.36201478 | -0.99489603 |
| C | -1.03741735 | -3.63101478 | -0.96489603 |
| O | 0.15958265  | -3.78101478 | -1.22789603 |
| C | -1.88941735 | -4.67801478 | -0.61189603 |

|   |             |             |             |
|---|-------------|-------------|-------------|
| C | -1.40141735 | -6.10101478 | -0.61089603 |
| C | -3.20541735 | -4.38701478 | -0.25289603 |
| N | -4.84741735 | -1.12701478 | -4.08789603 |
| C | -3.58441735 | -0.68701478 | -4.35289603 |
| O | -3.34641735 | 0.51298522  | -4.45789603 |
| N | -2.57641735 | -1.60001478 | -4.43489603 |
| C | -2.79441735 | -2.94301478 | -4.29589603 |
| O | -1.81241735 | -3.68601478 | -4.34389603 |
| C | -4.10141735 | -3.39201478 | -4.08189603 |
| C | -4.40941735 | -4.86301478 | -3.95089603 |
| C | -5.12541735 | -2.45501478 | -3.94289603 |
| N | -4.14641735 | 1.01898522  | -7.83189603 |
| C | -2.85641735 | 0.59998522  | -8.00689603 |
| O | -1.97941735 | 1.44398522  | -8.17689603 |
| N | -2.56441735 | -0.70601478 | -7.97389603 |
| C | -3.52941735 | -1.60801478 | -7.80089603 |
| N | -3.20941735 | -2.92801478 | -7.75789603 |
| C | -4.86741735 | -1.22801478 | -7.66989603 |
| C | -5.17141735 | 0.12998522  | -7.67989603 |
| N | 3.84258265  | -2.70401478 | -8.37889603 |
| C | 3.69258265  | -3.94101478 | -7.80789603 |
| N | 2.40958265  | -4.25901478 | -7.56589603 |
| C | 1.72958265  | -3.17101478 | -7.97889603 |
| C | 0.32558265  | -2.91301478 | -7.96489603 |
| O | -0.58841735 | -3.62501478 | -7.56689603 |
| N | 0.04158265  | -1.65401478 | -8.42889603 |
| C | 0.93558265  | -0.73501478 | -8.87389603 |
| N | 0.46358265  | 0.48998522  | -9.22889603 |
| N | 2.24158265  | -0.98601478 | -8.91889603 |
| C | 2.56558265  | -2.20901478 | -8.46289603 |
| N | 3.40858265  | 1.09198522  | -6.08889603 |
| C | 4.17658265  | 0.01698522  | -5.71389603 |
| N | 3.44358265  | -1.01901478 | -5.26289603 |
| C | 2.17158265  | -0.57901478 | -5.35889603 |
| C | 0.90658265  | -1.18601478 | -5.06089603 |
| N | 0.77758265  | -2.46601478 | -4.60489603 |
| N | -0.18841735 | -0.44601478 | -5.25389603 |
| C | -0.07341735 | 0.79798522  | -5.72889603 |
| N | 1.02958265  | 1.46898522  | -6.06389603 |
| C | 2.12058265  | 0.70298522  | -5.84489603 |
| N | 1.43358265  | 3.36998522  | -3.09189603 |
| C | 2.74058265  | 2.96398522  | -3.01689603 |
| N | 2.86858265  | 1.70298522  | -2.57089603 |
| C | 1.59558265  | 1.30598522  | -2.36689603 |
| C | 1.04458265  | 0.06998522  | -1.91389603 |
| N | 1.81258265  | -1.00901478 | -1.60389603 |
| N | -0.28141735 | -0.00901478 | -1.81089603 |
| C | -1.03441735 | 1.03798522  | -2.13889603 |
| N | -0.65141735 | 2.23098522  | -2.58189603 |
| C | 0.69658265  | 2.28798522  | -2.67289603 |
| N | -1.06141735 | 3.84698522  | 0.35810397  |
| C | -1.22841735 | 2.57198522  | 0.80910397  |
| O | -2.35941735 | 2.09798522  | 0.95510397  |
| N | -0.11941735 | 1.82198522  | 1.06610397  |
| C | 1.14458265  | 2.31798522  | 0.93010397  |
| O | 2.08458265  | 1.56698522  | 1.18210397  |
| C | 1.30158265  | 3.64398522  | 0.51510397  |
| C | 2.67458265  | 4.23598522  | 0.38710397  |
| C | 0.17358265  | 4.40198522  | 0.20110397  |
| N | -3.01041735 | 3.06698522  | 4.35810397  |
| C | -2.41341735 | 1.87698522  | 4.63910397  |
| O | -3.08741735 | 0.86298522  | 4.84410397  |

|   |             |             |             |
|---|-------------|-------------|-------------|
| N | -1.05041735 | 1.82598522  | 4.65010397  |
| C | -0.26841735 | 2.91098522  | 4.37810397  |
| O | 0.95458265  | 2.76098522  | 4.40510397  |
| C | -0.89641735 | 4.12298522  | 4.08610397  |
| C | -0.10741735 | 5.35498522  | 3.76510397  |
| C | -2.28541735 | 4.18398522  | 4.07910397  |
| H | 3.73664838  | -4.66406619 | 5.53000709  |
| H | 2.04664941  | 1.15636190  | 4.30369550  |
| H | -1.49134647 | -1.03577606 | 6.04042750  |
| H | -0.38215546 | -6.13651049 | 3.24208572  |
| H | 2.16801593  | -2.31867535 | 1.63326723  |
| H | -2.56966425 | -0.19282307 | 2.41840985  |
| H | -2.19782578 | -6.75098138 | -0.31394984 |
| H | -0.58678128 | -6.19821985 | 0.07599497  |
| H | -1.07254532 | -6.36598012 | -1.59402193 |
| H | -3.86566642 | -5.17452376 | 0.04509857  |
| H | -5.45938269 | -4.99484733 | -3.79248841 |
| H | -3.86980994 | -5.26781399 | -3.12031704 |
| H | -4.11751401 | -5.36971643 | -4.84696850 |
| H | -6.12251034 | -2.77560340 | -3.72397018 |
| H | -3.92263482 | -3.61044298 | -7.59785665 |
| H | -5.63861007 | -1.96222939 | -7.56458365 |
| H | -6.18077301 | 0.46812353  | -7.57143572 |
| H | 4.51354785  | -4.58766843 | -7.57821104 |
| H | -0.50859946 | 0.70033307  | -9.12586337 |
| H | 5.24482807  | 0.00386309  | -5.77372511 |
| H | -0.12881927 | -2.83384058 | -4.39719489 |
| H | -0.99330500 | 1.32898365  | -5.85830771 |
| H | 3.56999196  | 3.58464551  | -3.28477845 |
| H | 1.38347385  | -1.85025394 | -1.27498522 |
| H | -2.09015595 | 0.90091327  | -2.03153081 |
| H | 3.40587611  | 3.50151982  | 0.65294314  |
| H | 2.76185639  | 5.07893004  | 1.04034766  |
| H | 2.83499211  | 4.54961371  | -0.62324545 |
| H | 0.27627756  | 5.40473099  | -0.15785934 |
| H | 0.93779512  | 5.12929257  | 3.80375259  |
| H | -0.33384105 | 6.11951763  | 4.47863218  |
| H | -0.36255708 | 5.69626665  | 2.78360986  |
| H | -2.78187716 | 5.10505142  | 3.85535253  |
| H | -4.00889922 | 3.12204640  | 4.35661141  |
| H | -0.60538024 | 0.95703097  | 4.86657683  |
| H | 3.30057330  | -0.02640600 | 4.13418160  |
| H | 1.34436814  | -4.91552379 | 6.43487556  |
| H | -2.58941225 | -4.87355144 | 3.60819576  |
| H | -1.86965823 | 4.39214491  | 0.13551106  |
| H | -0.23631232 | 0.87484123  | 1.36485778  |
| H | 1.75683433  | -0.68210638 | 1.24266295  |
| H | -4.59109224 | -2.90320023 | -0.00892637 |
| H | -0.95147271 | -1.60918699 | -1.26566666 |
| H | 1.09016056  | 4.26136002  | -3.38772069 |
| H | 2.80631109  | -0.96103683 | -1.70490046 |
| H | -5.58757791 | -0.46066678 | -3.99765916 |
| H | -1.64499207 | -1.27697773 | -4.60250871 |
| H | 3.72218264  | 1.96650295  | -6.45886058 |
| H | 1.58947277  | -3.03598034 | -4.47850899 |
| H | -4.34350527 | 1.99922317  | -7.81486915 |
| H | 4.69137240  | -2.26191616 | -8.66890424 |
| H | 1.08869036  | 1.18041308  | -9.59296980 |
| H | -2.26071784 | -3.21695003 | -7.88629250 |
| H | -0.92178315 | -1.38607455 | -8.44048765 |

**Table S8:** CGCGA geometry (taken from PDB)

|   |             |             |             |
|---|-------------|-------------|-------------|
| N | 3.39958265  | 8.65798522  | 15.53310397 |
| C | 3.55358265  | 7.45098522  | 16.16810397 |
| O | 4.68958265  | 7.01098522  | 16.36710397 |
| N | 2.47258265  | 6.75798522  | 16.53010397 |
| C | 1.24658265  | 7.22298522  | 16.27310397 |
| N | 0.15758265  | 6.47398522  | 16.59710397 |
| C | 1.04858265  | 8.43898522  | 15.62410397 |
| C | 2.17258265  | 9.16798522  | 15.25410397 |
| N | 5.56658265  | 5.46698522  | 12.93310397 |
| C | 4.85558265  | 6.58098522  | 12.58210397 |
| N | 3.53658265  | 6.45198522  | 12.78910397 |
| C | 3.41258265  | 5.20898522  | 13.29510397 |
| C | 2.23358265  | 4.52198522  | 13.69810397 |
| O | 1.06858265  | 4.91298522  | 13.67110397 |
| N | 2.52658265  | 3.27598522  | 14.19010397 |
| C | 3.76358265  | 2.71398522  | 14.30810397 |
| N | 3.83758265  | 1.45298522  | 14.82110397 |
| N | 4.86658265  | 3.35698522  | 13.92310397 |
| C | 4.61958265  | 4.59098522  | 13.42710397 |
| N | 5.52558265  | 1.88598522  | 10.67410397 |
| C | 4.23858265  | 1.58098522  | 10.96910397 |
| O | 4.01458265  | 0.50898522  | 11.53510397 |
| N | 3.26458265  | 2.44398522  | 10.65510397 |
| C | 3.54658265  | 3.59998522  | 10.05010397 |
| N | 2.55058265  | 4.49598522  | 9.78210397  |
| C | 4.85558265  | 3.94198522  | 9.72410397  |
| C | 5.86658265  | 3.04498522  | 10.05210397 |
| N | 4.63458265  | -1.72201478 | 8.02210397  |
| C | 5.34658265  | -0.74001478 | 7.38510397  |
| N | 4.64258265  | 0.39098522  | 7.23010397  |
| C | 3.45058265  | 0.09698522  | 7.78810397  |
| C | 2.28158265  | 0.90098522  | 7.90210397  |
| O | 2.09858265  | 2.05398522  | 7.52110397  |
| N | 1.26258265  | 0.21098522  | 8.50510397  |
| C | 1.30158265  | -1.07301478 | 8.96910397  |
| N | 0.16058265  | -1.58701478 | 9.50610397  |
| N | 2.39758265  | -1.82401478 | 8.87010397  |
| C | 3.41358265  | -1.17801478 | 8.27410397  |
| N | 1.72058265  | -4.08701478 | 6.02010397  |
| C | 2.98758265  | -3.90001478 | 5.53510397  |
| N | 3.19258265  | -2.65701478 | 5.06610397  |
| C | 2.00258265  | -2.05001478 | 5.25110397  |
| C | 1.55958265  | -0.72401478 | 4.97210397  |
| N | 2.37458265  | 0.21898522  | 4.42110397  |
| N | 0.29558265  | -0.42501478 | 5.27110397  |
| C | -0.49241735 | -1.35101478 | 5.82210397  |
| N | -0.20741735 | -2.61101478 | 6.13710397  |
| C | 1.07958265  | -2.89301478 | 5.81410397  |
| N | -3.01041735 | 3.06698522  | 4.35810397  |
| C | -2.41341735 | 1.87698522  | 4.63910397  |
| O | -3.08741735 | 0.86298522  | 4.84410397  |
| N | -1.05041735 | 1.82598522  | 4.65010397  |
| C | -0.26841735 | 2.91098522  | 4.37810397  |
| O | 0.95458265  | 2.76098522  | 4.40510397  |
| C | -0.89641735 | 4.12298522  | 4.08610397  |
| C | -0.10741735 | 5.35498522  | 3.76510397  |
| C | -2.28541735 | 4.18398522  | 4.07910397  |
| N | -3.34241735 | 1.55298522  | 8.48410397  |
| C | -2.13641735 | 0.93598522  | 8.48210397  |
| O | -2.11041735 | -0.27201478 | 8.73210397  |

|   |             |             |             |
|---|-------------|-------------|-------------|
| N | -1.03141735 | 1.63598522  | 8.18810397  |
| C | -1.11041735 | 2.93498522  | 7.89210397  |
| N | 0.01458265  | 3.62498522  | 7.55710397  |
| C | -2.33241735 | 3.60598522  | 7.88910397  |
| C | -3.47741735 | 2.87498522  | 8.18810397  |
| N | -3.07141735 | 1.35398522  | 12.69610397 |
| C | -3.63341735 | 2.54198522  | 12.31210397 |
| N | -2.74941735 | 3.35898522  | 11.71910397 |
| C | -1.59841735 | 2.64998522  | 11.73310397 |
| C | -0.30041735 | 2.99998522  | 11.25510397 |
| O | 0.07658265  | 4.05398522  | 10.73810397 |
| N | 0.59758265  | 1.97998522  | 11.46110397 |
| C | 0.35258265  | 0.77298522  | 12.04410397 |
| N | 1.39558265  | -0.08901478 | 12.19110397 |
| N | -0.85541735 | 0.44898522  | 12.50310397 |
| C | -1.76841735 | 1.42598522  | 12.30410397 |
| N | -0.52641735 | -0.07101478 | 16.32310397 |
| C | 0.52858265  | 0.59198522  | 15.78310397 |
| O | 1.58658265  | -0.01901478 | 15.65710397 |
| N | 0.39658265  | 1.87398522  | 15.41010397 |
| C | -0.77241735 | 2.50698522  | 15.55710397 |
| N | -0.89941735 | 3.80998522  | 15.17110397 |
| C | -1.87541735 | 1.86298522  | 16.12010397 |
| C | -1.73541735 | 0.53698522  | 16.51210397 |
| N | 2.49358265  | 0.65598522  | 19.29210397 |
| C | 1.20358265  | 0.53298522  | 19.73310397 |
| N | 0.45858265  | 1.61098522  | 19.46110397 |
| C | 1.31958265  | 2.43298522  | 18.82610397 |
| C | 1.09458265  | 3.72598522  | 18.27010397 |
| O | 0.04858265  | 4.36998522  | 18.22010397 |
| N | 2.25558265  | 4.25398522  | 17.75710397 |
| C | 3.48658265  | 3.66298522  | 17.73210397 |
| N | 4.53758265  | 4.38298522  | 17.24910397 |
| N | 3.67958265  | 2.43498522  | 18.20610397 |
| C | 2.56058265  | 1.88998522  | 18.72310397 |
| H | 0.27641164  | 5.57655510  | 17.02195553 |
| H | 0.06301317  | 8.80043478  | 15.41696388 |
| H | 2.07300030  | 10.11162416 | 14.75960535 |
| H | 5.30568447  | 7.46580129  | 12.18284358 |
| H | 3.00522262  | 0.98315664  | 15.11510719 |
| H | 1.61276986  | 4.30204206  | 10.07001580 |
| H | 5.07765628  | 4.86767395  | 9.23555135  |
| H | 6.88830652  | 3.26229117  | 9.82024527  |
| H | 6.35470116  | -0.86211314 | 7.04792590  |
| H | 0.16341096  | -2.50595989 | 9.90047928  |
| H | 3.73664838  | -4.66406619 | 5.53000709  |
| H | 2.04664942  | 1.15636190  | 4.30369550  |
| H | -1.49134647 | -1.03577606 | 6.04042750  |
| H | 0.93779512  | 5.12929257  | 3.80375259  |
| H | -0.33384105 | 6.11951763  | 4.47863218  |
| H | -0.36255708 | 5.69626665  | 2.78360986  |
| H | -2.78187716 | 5.10505142  | 3.85535253  |
| H | 0.90234451  | 3.16468321  | 7.55807276  |
| H | -2.38779466 | 4.65054219  | 7.66386173  |
| H | -4.44090946 | 3.34036287  | 8.18553627  |
| H | -4.66236149 | 2.79104800  | 12.46747993 |
| H | 1.25949199  | -0.96389418 | 12.65593228 |
| H | -1.75213337 | 4.30233317  | 15.34565736 |
| H | -2.80519509 | 2.37717531  | 16.24668165 |
| H | -2.55388174 | 0.00551825  | 16.95091933 |
| H | 0.83089691  | -0.33206579 | 20.24073779 |
| H | 5.38210291  | 4.07477059  | 17.68704149 |

|   |             |             |             |
|---|-------------|-------------|-------------|
| H | 4.18019239  | 9.20999262  | 15.23995509 |
| H | 3.24809227  | 0.00053892  | 19.32535125 |
| H | -3.48706832 | 0.58458874  | 13.18114348 |
| H | -4.16774259 | 1.00344434  | 8.61388484  |
| H | -0.41352075 | -1.02794784 | 16.59056139 |
| H | 6.55947293  | 5.35592067  | 12.89028390 |
| H | 6.25955164  | 1.25987304  | 10.93730172 |
| H | 1.34436815  | -4.91552379 | 6.43487556  |
| H | 4.94650844  | -2.64365347 | 8.25293818  |
| H | -4.00889922 | 3.12204641  | 4.35661141  |
| H | -0.68011934 | -1.04551671 | 9.50606536  |
| H | 0.39762006  | 0.70008446  | 8.61745013  |
| H | 2.29798415  | 0.15253774  | 11.83427920 |
| H | 1.53372817  | 2.14144961  | 11.14875671 |
| H | 4.72422012  | 0.99789687  | 14.90337544 |
| H | 1.75207810  | 2.72132363  | 14.49423095 |
| H | 2.19192485  | 5.16930714  | 17.35944398 |
| H | 3.30057331  | -0.02640600 | 4.13418159  |
| H | 4.39522293  | 5.35316369  | 17.44528614 |
| H | -0.76148467 | 6.82102186  | 16.41033985 |
| H | -0.13974889 | 4.27229058  | 14.71374462 |
| H | 2.75939600  | 5.34573510  | 9.29803567  |
| H | -0.04694435 | 4.59204461  | 7.31010080  |
| H | -0.60538024 | 0.95703098  | 4.86657682  |

**Table S9:** Shielding values (in ppm) for thymine employing B3LYP and KT3 functionals and Pople-type basis sets.

|                       | <b>N3</b> | <b>H3</b> | <b>C2</b> | <b>C4</b> |
|-----------------------|-----------|-----------|-----------|-----------|
| B3LYP/6-311G          | 88.40     | 26.76     | 39.78     | 26.05     |
| B3LYP/6-311G(d,p)     | 84.13     | 25.50     | 32.97     | 19.56     |
| B3LYP/6-311++G(d,p)   | 80.52     | 25.06     | 30.78     | 17.07     |
| B3LYP/6-311G(2df,2pd) | 82.87     | 24.83     | 30.70     | 17.15     |
| KT3/6-311++G(d,p)     | 93.10     | 25.18     | 49.62     | 37.69     |
| KT3/6-311++G(2d,2p)   | 90.84     | 24.68     | 48.78     | 36.90     |
| KT3/6-311G(2df,2pd)   | 95.38     | 24.92     | 49.93     | 38.04     |
| KT3/6-311++G(3df,3pd) | 92.85     | 24.47     | 48.06     | 36.17     |

**Table S10:** Shielding values (in ppm) for thymine at B3LYP/cc-pVTZ level of theory.

| <b>B3LYP/cc-pVTZ</b>            |           |           |           |           |           |           |           |           |
|---------------------------------|-----------|-----------|-----------|-----------|-----------|-----------|-----------|-----------|
| <b>(ppm)</b>                    | <b>C4</b> | <b>N3</b> | <b>H3</b> | <b>C2</b> | <b>N1</b> | <b>H1</b> | <b>O4</b> | <b>O2</b> |
| <b><math>\sigma</math> dia</b>  | 238,73    | 317,28    | 32,42     | 240,57    | 313,37    | 31,35     | 401.09    | 397.44    |
| <b><math>\sigma</math> para</b> | -221,56   | -234,93   | -7,64     | -209,65   | -196,99   | -5,76     | -490.62   | -388.15   |
| <b><math>\sigma</math></b>      | 17,17     | 82,36     | 24,78     | 30,92     | 116,38    | 25,6      | -89.53    | 9.28      |

**Table S11:** Shielding values (in ppm) for thymine at KT2/cc-pVTZ level of theory.

| KT2/cc-pVTZ   |         |         |       |         |         |        |         |         |
|---------------|---------|---------|-------|---------|---------|--------|---------|---------|
| (ppm)         | C4      | N3      | H3    | C2      | N1      | H1     | O4      | O2      |
| $\sigma$ dia  | 489,71  | 502,90  | 26,71 | 468,91  | 472,00  | -33,04 | 444,62  | 406,46  |
| $\sigma$ para | -453,16 | -409,12 | -2,00 | -420,43 | -347,71 | 58,49  | -502,62 | -376,29 |
| $\sigma$      | 36,55   | 93,77   | 24,71 | 48,48   | 124,28  | 25,45  | -57,99  | 30,16   |

**Table S12:** Shielding values (in ppm) for thymine at KT2/aug-cc-pVTZ level of theory.

| KT2/aug-cc-pVTZ |         |         |       |         |         |        |         |         |
|-----------------|---------|---------|-------|---------|---------|--------|---------|---------|
| (ppm)           | C4      | N3      | H3    | C2      | N1      | H1     | O4      | O2      |
| $\sigma$ dia    | 497,37  | 504,55  | 27,35 | 478,96  | 465,47  | -33,23 | 445,46  | 408,16  |
| $\sigma$ para   | -461,19 | -411,37 | -2,95 | -430,67 | -341,29 | 58,43  | -495,56 | -369,05 |
| $\sigma$        | 36,18   | 93,18   | 24,40 | 48,29   | 124,28  | 25,20  | -50,09  | 39,11   |

**Table S13:** Shielding values (in ppm) for thymine at KT3/cc-pVTZ level of theory.

| KT3/cc-pVTZ   |         |         |       |         |         |        |         |         |
|---------------|---------|---------|-------|---------|---------|--------|---------|---------|
| (ppm)         | C4      | N3      | H3    | C2      | N1      | H1     | O4      | O2      |
| $\sigma$ dia  | 490,11  | 503,37  | 26,56 | 469,41  | 472,12  | -33,34 | 444,21  | 406,09  |
| $\sigma$ para | -453,15 | -408,78 | -1,69 | -420,39 | -347,55 | 58,92  | -500,02 | -374,10 |
| $\sigma$      | 36,95   | 94,58   | 24,86 | 49,02   | 124,56  | 25,58  | -55,80  | 31,98   |

**Table S14:** J-couplings ( in Hz) for thymine at B3LYP/cc-pVTZ, KT3/cc-pVTZ and SOPPA/cc-pVTZ levels of theory.

|               | FC     | SD    | PSO   | DSO   | Total  |
|---------------|--------|-------|-------|-------|--------|
| B3LYP/cc-pVTZ |        |       |       |       |        |
| J(N3-C4)      | -10.58 | -0.07 | 2.69  | -0.15 | -8.11  |
| J(N3-H3)      | -80.54 | -0.13 | -1.98 | -0.5  | -83.15 |
| J(C2-N1)      | -22.51 | -0.15 | 2.62  | -0.15 | -20.21 |
| J(N1-H1)      | -86.62 | -0.21 | -2.20 | -0.46 | -89.50 |
| KT3/cc-pVTZ   |        |       |       |       |        |
| J(N3-C4)      | -0.38  | -0.08 | 2.36  | -0.15 | 1.73   |
| J(N3-H3)      | -78.99 | -0.15 | -1.85 | -0.49 | -81.48 |
| J(C2-N1)      | -11.25 | -0.17 | 2.24  | -0.15 | -9.33  |
| J(N1-H1)      | -85.99 | -0.24 | -2.06 | -0.45 | -88.73 |
| SOPPA/cc-pVTZ |        |       |       |       |        |
| J(N3-C4)      | -10.99 | -0.08 | 2.33  | -0.15 | -8.89  |
| J(N3-H3)      | -81.50 | -0.07 | -1.68 | -0.49 | -83.73 |
| J(C2-N1)      | -22.63 | -0.13 | 2.31  | -0.15 | -20.59 |
| J(N1-H1)      | -86.48 | -0.14 | -1.91 | -0.46 | -88.98 |

**Table S15:** J-couplings ( in Hz) for adenine-thymine at KT3/6-311G(2df,2pd), B3LYP/cc-pVTZ and SOPPA/aug-cc-pCVTZ levels of theory.

|                            | FC     | SD    | PSO   | DSO   | Total  |
|----------------------------|--------|-------|-------|-------|--------|
| <b>KT3/6-311G(2df,2pd)</b> |        |       |       |       |        |
| J(N6-H6)                   | -94.63 | -0.18 | -1.44 | -0.41 | -96.68 |
| J(N1-N3)                   | -4.87  | -0.04 | 0.01  | -0.01 | -4.92  |
| J(N3-H3)                   | -84.24 | -0.08 | -0.87 | -0.59 | -85.79 |
| <b>B3LYP/cc-pVTZ</b>       |        |       |       |       |        |
| J(N6-H6)                   | -86.62 | -0.14 | -1.53 | -0.41 | -88.72 |
| J(N1-N3)                   | -4.54  | -0.04 | 0.01  | -0.01 | -4.59  |
| J(N3-H3)                   | -80.83 | -0.04 | -0.95 | -0.42 | -82.43 |
| <b>SOPPA/aug-cc-pCVTZ</b>  |        |       |       |       |        |
| J(N3-C4)                   | -11.46 | -0.08 | 2.38  | -0.14 | -9.31  |

**Table S16:** Shielding values (in ppm) for GC base pair at B97//cc-pCVTZ/cc-pVTZ level of theory.

|                  | Guanine |        |       |       |       |       | Cytosine |       |       |       |       |
|------------------|---------|--------|-------|-------|-------|-------|----------|-------|-------|-------|-------|
|                  | N1      | N2     | C6    | C2    | H1    | H2    | N4       | N3    | C4    | C2    | H4    |
| Isolated GC pair | 98.55   | 174.44 | 21.91 | 24.50 | 18.37 | 22.09 | 144.12   | 37.37 | 12.00 | 26.98 | 19.96 |
| GCG              | 95.47   | 164.43 | 21.82 | 22.71 | 18.37 | 22.06 | 143.04   | 38.30 | 12.29 | 27.53 | 20.60 |
| CGCGA            | 95.71   | 164.50 | 21.97 | 23.00 | 18.69 | 22.42 | 143.80   | 37.87 | 12.49 | 27.79 | 20.81 |

**Table S17:** Shielding values (in ppm) for GC base pair at B97-D//cc-pCVTZ/cc-pVTZ level of theory.

|                  | Guanine |        |       |       |       |       | Cytosine |       |       |       |       |
|------------------|---------|--------|-------|-------|-------|-------|----------|-------|-------|-------|-------|
|                  | N1      | N2     | C6    | C2    | H1    | H2    | N4       | N3    | C4    | C2    | H4    |
| Isolated GC pair | 97.03   | 170.92 | 24.41 | 26.96 | 18.49 | 22.12 | 140.34   | 36.87 | 15.09 | 28.98 | 19.99 |
| GCG              | 93.72   | 160.90 | 24.22 | 25.21 | 18.46 | 22.06 | 139.35   | 37.71 | 15.46 | 29.56 | 20.62 |
| CGCGA            | 93.97   | 160.97 | 24.38 | 25.50 | 18.77 | 22.41 | 140.04   | 37.32 | 15.65 | 29.80 | 20.81 |

**Table S18:** J-couplings (in Hz) for GC base pair at B97-D/6-311G(2df,2pd) level of theory.

|                 | FC     | SD    | PSO   | DSO   | Total  |
|-----------------|--------|-------|-------|-------|--------|
| <b>Isolated</b> |        |       |       |       |        |
| J(C6-N1)        | -16.41 | -0.17 | 2.76  | -0.17 | -13.98 |
| J(N1-H1)        | -72.51 | -0.14 | -1.14 | -0.67 | -74.46 |
| J(N1-N3)        | -4.18  | -0.04 | 0.03  | -0.01 | -4.21  |
| J(N2-H2)        | -80.90 | -0.20 | -1.32 | -0.46 | -82.87 |
| J(N4-H4)        | -82.31 | -0.27 | -0.94 | -0.45 | -83.97 |
| <b>GCG</b>      |        |       |       |       |        |
| J(C6-N1)        | -16.48 | -0.17 | 2.81  | -0.21 | -14.05 |
| J(N1-H1)        | -72.61 | -0.17 | -0.90 | -0.84 | -74.51 |
| J(N1-N3)        | -4.33  | -0.04 | 0.04  | -0.03 | -4.36  |
| J(N2-H2)        | -81.15 | -0.22 | -1.09 | -0.60 | -83.06 |
| J(N4-H4)        | -82.23 | -0.27 | -0.83 | -0.57 | -83.91 |
| <b>CGCGA</b>    |        |       |       |       |        |
| J(C6-N1)        | -16.55 | -0.17 | 2.82  | -0.21 | -14.11 |
| J(N1-H1)        | -72.54 | -0.17 | -0.88 | -0.86 | -74.44 |
| J(N1-N3)        | -4.33  | -0.04 | 0.04  | -0.03 | -4.36  |
| J(N2-H2)        | -81.12 | -0.22 | -1.08 | -0.62 | -83.03 |
| J(N4-H4)        | -82.20 | -0.27 | -0.81 | -0.60 | -83.88 |
